# Supplementary material
Source: MDPI journal article supplement (https://www.mdpi.com/1424-2818/15/4/556)
Supplement: s1 [file s1]

# Supplementary material

Table S1: List of tree species and their abundance.

|                                                         | Site 1 | Site 2 | Total |
|---------------------------------------------------------|--------|--------|-------|
| <b>Pinaceae</b>                                         |        |        |       |
| <i>Larix decidua</i> Mill.                              | 7      | 4      | 11    |
| <i>Pinus sylvestris</i> L.                              | 5      | 28     | 33    |
| <b>Fabaceae</b>                                         |        |        |       |
| <i>Laburnum</i> sp.                                     | 1      | 0      | 1     |
| <b>Rosaceae</b>                                         |        |        |       |
| <i>Prunus avium</i> (L.) L.                             | 41     | 11     | 52    |
| <i>Prunus cerasifera</i> Ehrh.                          | 1      | 0      | 1     |
| <i>Pyrus</i> sp.                                        | 2      | 0      | 2     |
| <b>Fagaceae</b>                                         |        |        |       |
| <i>Castanea sativa</i> Mill.                            | 63     | 172    | 235   |
| <i>Quercus pubescens</i> Willd. subsp. <i>pubescens</i> | 14     | 11     | 25    |
| <b>Betulaceae</b>                                       |        |        |       |
| <i>Betula pendula</i> Roth                              | 2      | 0      | 2     |
| <i>Corylus avellana</i> L.                              | 4      | 0      | 4     |
| <b>Salicaceae</b>                                       |        |        |       |
| <i>Populus alba</i> L.                                  | 2      | 0      | 2     |
| <i>Salix</i> sp.                                        | 7      | 0      | 7     |
| <b>Sapindaceae</b>                                      |        |        |       |
| <i>Acer opalus</i> Mill. subsp. <i>opalus</i>           | 1      | 0      | 1     |
| <i>Acer pseudoplatanus</i> L.                           | 1      | 0      | 1     |
| <b>Cornaceae</b>                                        |        |        |       |
| <i>Cornus sanguinea</i> L.                              | 8      | 0      | 8     |
| <b>Oleaceae</b>                                         |        |        |       |
| <i>Fraxinus excelsior</i> L. subsp. <i>excelsior</i>    | 104    | 13     | 117   |

Table S2: Forest variable influence on each PCA axis.

|                      | PC1    | PC2    | PC3   | PC4          |
|----------------------|--------|--------|-------|--------------|
| Abundance (N)        | -0.265 | -0.176 | 0.292 | 0.132        |
| Species richness (N) | -0.150 | 0.180  | 0.368 | <b>0.599</b> |
| SDT_Abundance (N)    | 0.270  | 0.348  | 0.262 | -0.177       |

|                                 |               |               |               |               |
|---------------------------------|---------------|---------------|---------------|---------------|
| SDT_Species_rich (N)            | -0.241        | 0.282         | -0.285        | 0.462         |
| SDT_Height (m)                  | -0.259        | -0.412        | 0.217         | 0.007         |
| SDT_Diameter (cm)               | -0.244        | <b>-0.446</b> | -0.043        | -0.173        |
| SDT_volume (m <sup>3</sup> /ha) | <b>-0.364</b> | -0.272        | -0.080        | -0.069        |
| CWD_Diameter (cm)               | -0.288        | 0.312         | -0.316        | 0.040         |
| CWD_Height (m)                  | -0.236        | 0.134         | <b>-0.511</b> | 0.035         |
| CWD_volume (m <sup>3</sup> /ha) | -0.276        | 0.283         | 0.055         | <b>-0.340</b> |
| Basal_area (m <sup>2</sup> /ha) | -0.368        | -0.259        | 0.058         | -0.044        |
| CWD decay stage                 | -0.280        | 0.066         | -0.425        | 0.263         |
| Chestnut trees (%)              | <b>0.297</b>  | -0.166        | -0.160        | -0.393        |

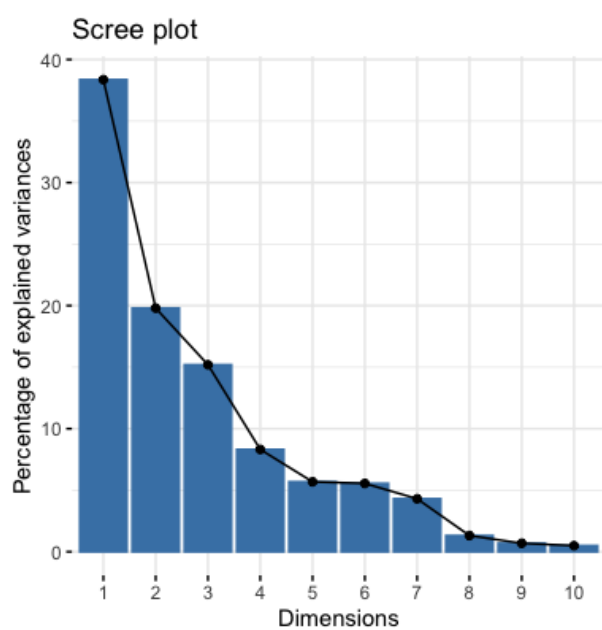

Figure S1: PCA results: PCA screen plot

Table S3. Forest variables that affect differences between beetle communities in the two sites 1 and 2.

|                          | NMDS1  | NMDS2  | r2    | Pr(>r)    |
|--------------------------|--------|--------|-------|-----------|
| Abundance                | -0.182 | 0.983  | 0.050 | 0.757     |
| Species richness         | -0.848 | 0.530  | 0.108 | 0.528     |
| SDT_Abundance            | -0.644 | 0.765  | 0.706 | 0.001 *** |
| SDT_Species_richness     | -0.672 | 0.741  | 0.544 | 0.018 *   |
| SDT_Height               | 0.498  | 0.867  | 0.053 | 0.757     |
| SDT_Diameter             | 0.788  | 0.616  | 0.098 | 0.621     |
| CWD_Diameter             | -0.963 | 0.271  | 0.335 | 0.112     |
| CWD_Height               | -0.884 | -0.468 | 0.207 | 0.288     |
| CWD_volume               | -0.734 | 0.679  | 0.319 | 0.107     |
| SDT_volume               | -0.780 | 0.626  | 0.112 | 0.551     |
| Basal_area               | -0.770 | 0.638  | 0.133 | 0.482     |
| CWD decay stage          | -0.908 | 0.419  | 0.123 | 0.480     |
| Chestnut tree proportion | 0.941  | -0.339 | 0.328 | 0.123     |

Table S4: Results of GLM analysis on species abundance.

| Beetle abundance | Estimate | Std. Error | z value | Pr(> z )   |
|------------------|----------|------------|---------|------------|
| (Intercept)      | 2.691    | 0.322      | 8.340   | <0.001 *** |
| Site             | 0.252    | 0.555      | 0.454   | 0.647      |
| CWD_volume       | 0.935    | 0.268      | 3.485   | <0.001 *** |

|                  |        |       |        |       |
|------------------|--------|-------|--------|-------|
| SDT_volume       | 0.338  | 0.329 | 1.027  | 0.304 |
| SDT_Diameter     | -0.343 | 0.277 | -1.239 | 0.215 |
| CWD_Height       | -0.082 | 0.199 | -0.410 | 0.685 |
| Species_richness | 0.381  | 0.249 | 1.528  | 0.126 |
| Chestnut trees   | 0.548  | 0.332 | 1.652  | 0.098 |

Table S5: Results of GLM analysis on species richness.

| <b>Beetle species richness</b> | Estimate | Std. Error | z value | Pr(> z )   |
|--------------------------------|----------|------------|---------|------------|
| (Intercept)                    | 0.009    | 0.229      | 0.041   | 0.96753    |
| Site                           | 0.370    | 0.397      | 0.933   | 0.351      |
| CWD_volume                     | 0.754    | 0.186      | 4.051   | <0.001 *** |
| SDT_volume                     | 0.445    | 0.231      | 1.929   | 0.054      |
| SDT_Diameter                   | -0.582   | 0.198      | -2.936  | 0.003 **   |
| CWD_Height                     | -0.132   | 0.145      | -0.910  | 0.363      |
| Species_richness               | 0.357    | 0.179      | 1.996   | 0.046 *    |
| Chestnut trees                 | 0.341    | 0.230      | 1.478   | 0.140      |
